# MIND TO MIND

Creative writing that explores the abstract side of our profession and our lives

*Stephen T. Harvey, M.D., Editor*

## From Room 1000

Janice Bethany

Look there.  
The sun is rising  
over a path  
by a winding river.  
Green shades vibrate  
by crystal blue sky  
where an egret flies perfectly.  
It is white, a release from God.  
The pillars of the bridge  
catch the last moon glow  
and I see myself  
ascending fern-lined banks  
like an astronaut  
who landed on Earth by mistake.  
Surprised.  
I do not know if it is white where I am going.  
But it is white now.  
One aide hoists me up in a basket,  
One changes sheets. one brings pills.  
My feet dangle,  
foolish, clawed, yellowed.  
No one notices the tan-line  
above the sole  
of the running shoes I used to wear.

This poem is one of the finalists of ANESTHESIOLOGY's 2019 annual creative writing competition, The Letheon. janbethany24@gmail.com.

Accepted for publication October 30, 2019. Published online first on November 25, 2019.

Permission to reprint granted to the American Society of Anesthesiologists, Inc. by copyright author/owner. Anesthesiology 2020; 132:395. DOI: 10.1097/ALN.0000000000003073
